# Supplementary material
Source: PubMed Central journal article supplement (PMC3315234)
Supplement: supp_tpc.111.093740_tpc093740_Supp_Data.pdf [file supp_tpc.111.093740_tpc093740_Supp_Data.pdf]

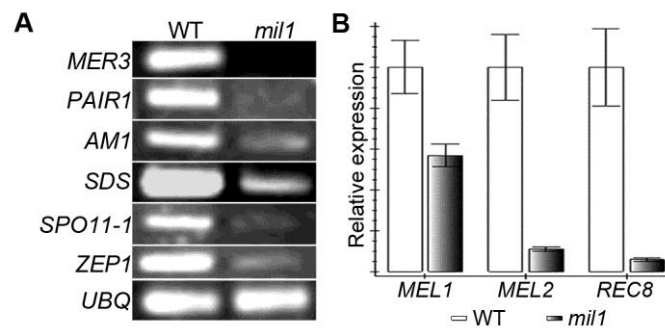

**Supplemental Figure 1. Meiosis related genes are downregulated in *mil1* anthers.**

(A) RT-PCR analysis of *MER3*, *PAIR1*, *AM1*, *SDS*, *SPO11-1*, and *ZEP1* expression in wild-type meiotic panicles and *mil1* panicles at similar development stage (5 cm), using *Ubiquitin (UBQ)* as a control. (B) qRT-PCR analysis of *MEL1*, *MEL2* and *REC8* expression in wild-type meiotic panicles and *mil1* panicles at similar development stage (5 cm), with *UBQ* as a control.

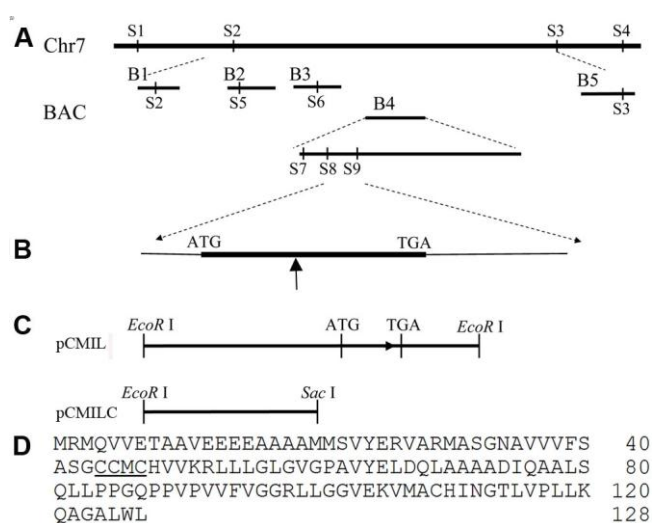

### Supplemental Figure 2. Isolation of the *MIL1* gene and molecular characterization.

(A) Fine mapping of the *MIL1* locus. BACs: B1, AP004010; B2, AP003824; B3, AP004263; B4, AP003704; B5, AP003847. S1 to S9 are markers developed in this work (Table S1). The *MIL1* locus was located to a 13 Kb region between the two markers S8 and S9. (B) *MIL1* gene structure. The *mil1* genome has insertion in the marked site. (C) Complementation constructs. The plasmid pCMIL contains the entire *MIL1* ORF, the 3870 bp upstream and 1306 bp downstream region. The pCMILC control vector contains only a partial upstream region. (D) The MIL1 protein sequence. The amino acids composing the active site are underlined.

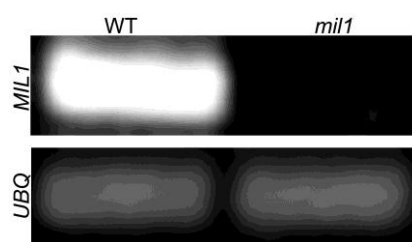

**Supplemental Figure 3. RT-PCR analysis shows no detectable *MIL1* transcripts in *mil1* panicles at meiotic stages, with *UBQ* used as a control.**

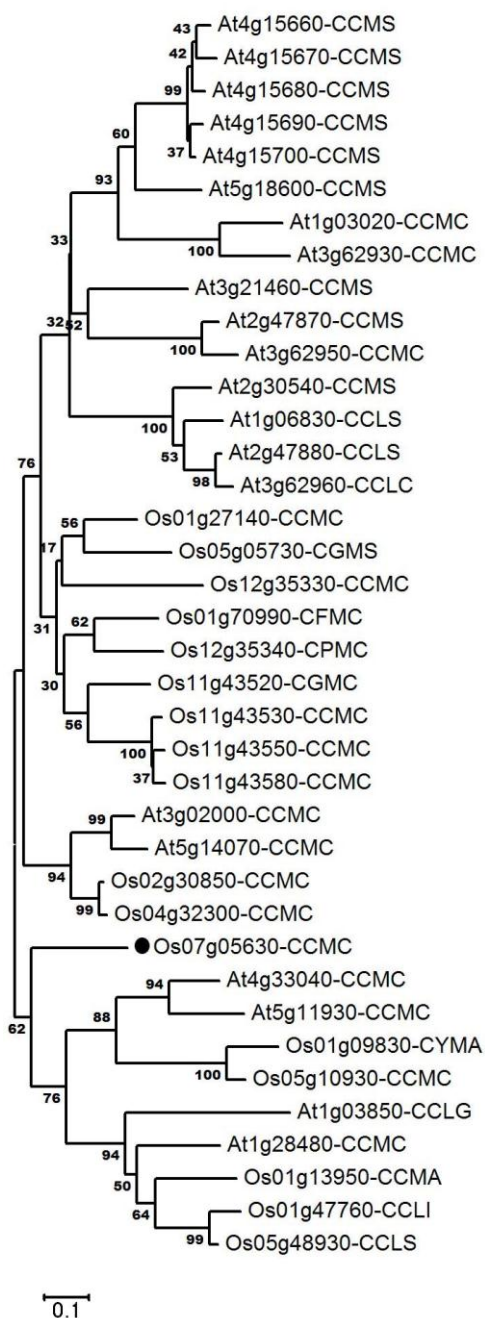

#### Supplemental Figure 4. Phylogeny of the CC type glutaredoxins.

Phylogenetic tree of CC type glutaredoxins from *Arabidopsis* and rice using MEGA 3.1 based on the alignment given in Supplemental Dataset 1 online. Bootstrap values are percentage of 1000 replicates. The black dot shows the position of MIL1 (Os07g05630).

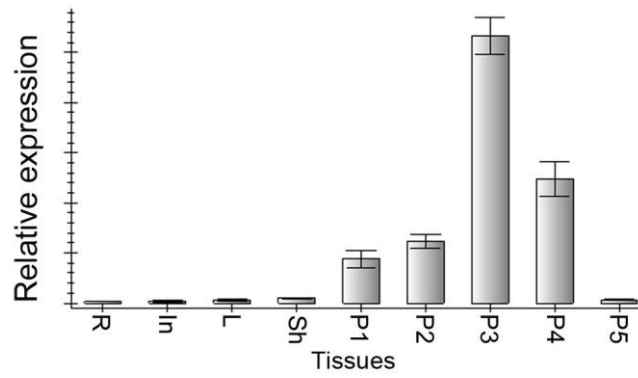

**Supplemental Figure 5. qRT-PCR analysis of *MIL1* expression.**

R: root; In: internode; L, leaf; Sh: sheath; P1: 1 cm panicles; P2: 3 cm panicles; P3: 5 cm panicles; P4: 10 cm panicles; P5: booting panicles.

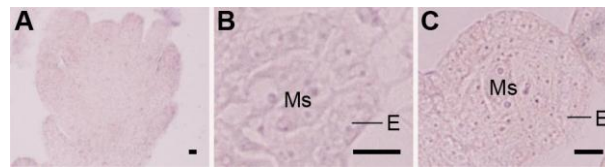

**Supplemental Figure 6. Control hybridization of *MIL1* RNA *in situ* analysis.**

Wild-type anthers hybridized with *MIL1* sense probe. (A) At the stamen primordial stage. (B) At archesporial cells stage. (C) At the parietal and sporogenous cells differentiation stage. E, epidermis. Scale bars, 10  $\mu$ m.

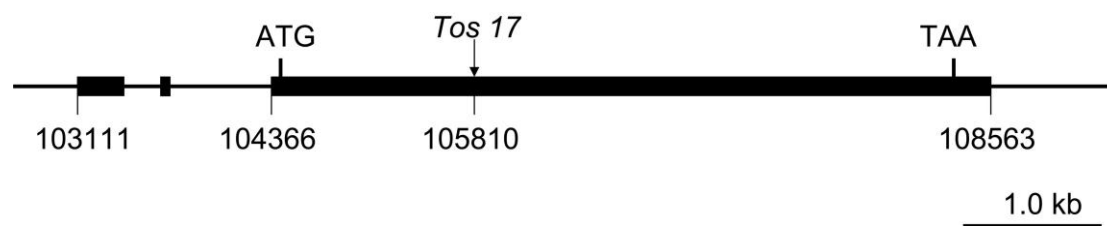

**Supplemental Figure 7. Structure of the *msp1-5* allele.**

Numbering of the coordinates is based on the BAC clone AP003451 containing the *MSP1* gene.

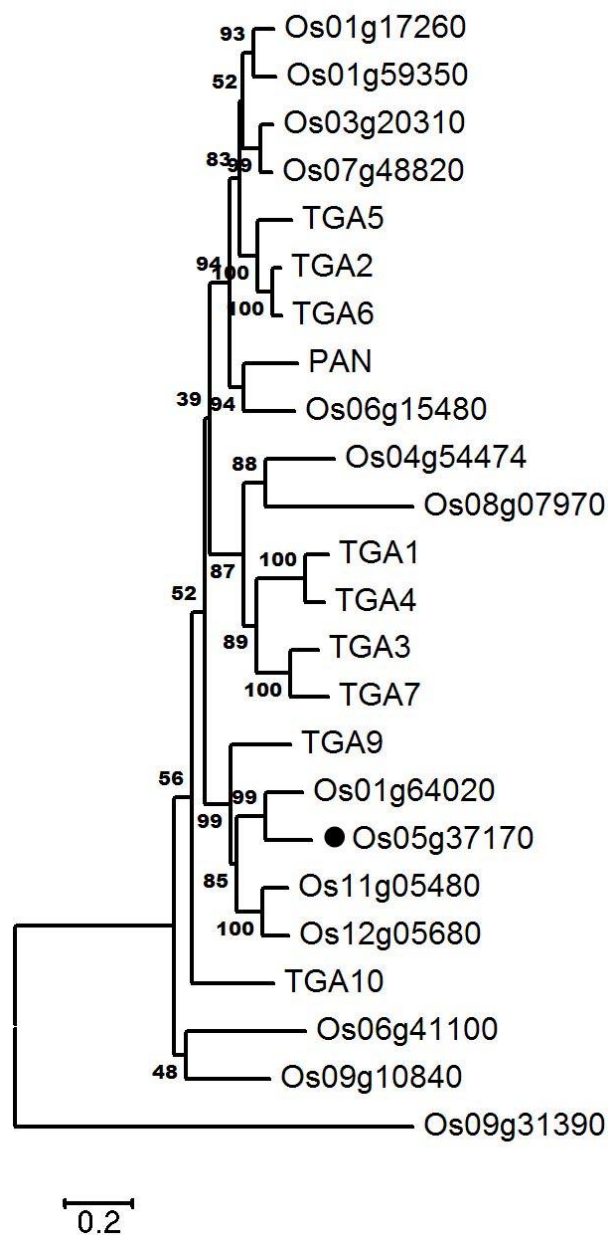

**Supplemental Figure 8. Phylogenetic tree of the *Arabidopsis* and rice TGA proteins.**

Phylogenetic analysis of TGA proteins from *Arabidopsis* and rice using MEGA 3.1 based on the alignment given in Supplemental Dataset 2 online. Bootstrap values are percentage of 1000 replicates. The black dot shows the position of the rice TGA1 (Os05g37170).



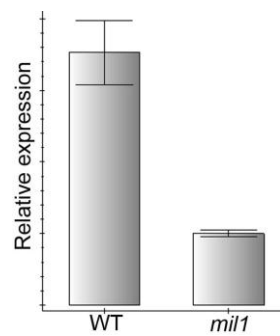

**Supplemental Figure 9.** qRT-PCR analysis shows rice *TGA1* having a much lower expression level in *mil1* panicles at meiotic stages, with *UBQ* used as a control.

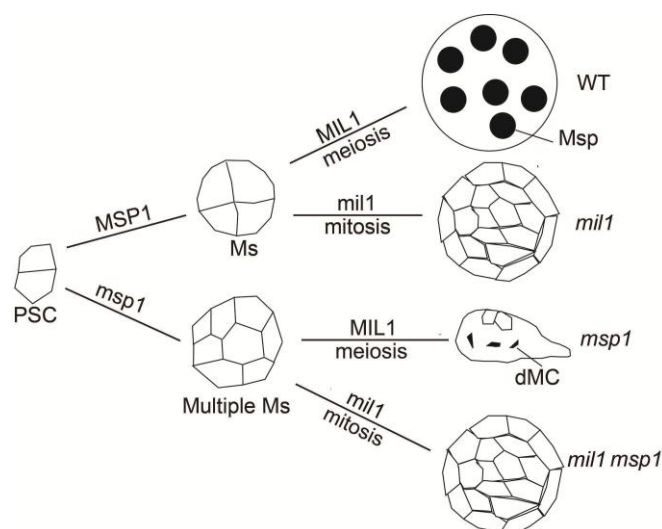

**Supplemental Figure 10. Diagram for MSP1 and MIL1 function in male reproductive cell development.**

In rice anthers, MSP1 inhibits the production of extra microsporocytes, and MIL1 regulates the initiation of meiosis in microsporocytes. In *msp1* mutant, multiple microsporocytes are generated; these microsporocytes will enter meiosis but can't complete successfully, and they finally will degenerate with the microsporangium crushed. In *mil1*, initially normal number of SCPs are produced, which couldn't enter meiosis but divide mitotically, leading to a microsporangium filled with parenchyma cells. Due to the absence of MIL1, the excess SCPs generated in *mil1 msp1* double mutant couldn't initiate meiosis; instead, they continue mitosis and produce a *mil1*-like microsporangium. PSC, primary sporogenous cell; Ms, microsporocyte; Msp, microspore; dMC, degenerated meiocytes.

**Supplemental Table 1. List of the PCR-based molecular markers developed in this study**

| Marker <sup>a</sup> | Primer Pairs                                                    | BAC <sup>b</sup> |
|---------------------|-----------------------------------------------------------------|------------------|
| S1                  | F 5'-CGTCGATCGTCAAGACGCA-3'<br>R 5'-CGAGCTTGAGCTTGCCCTGA-3'     | AP004314         |
| S2                  | F 5'-GCTAATGCAGCTTCTACCA-3'<br>R 3'-GTTTCCCAGTTTCTGTCTTC-3'     | AP004010         |
| S3                  | F 5'-CAGGAGTTAGCGATCAAAGT-3'<br>R 3'-CAACATATCTGCAGTAGCTG-3'    | AP003847         |
| S4                  | F 5'-GGAGTCTAACACTAATCTGA-3'<br>R 3'-GGCTAGCCTTTATCTTCGAT -3'   | AP004307         |
| S5                  | F 5'-TGATGGGATGTATGCTGTG-3'<br>R 5'-AACCACAGGAAGAGCCAC-3'       | AP003824         |
| S6                  | F 5'-TGGGGAGGTCGGAGTTTTTC-3'<br>R 5'-TGGTCGTGAATCTGCTGGTAGTG-3' | AP004263         |
| S7                  | F 5'-GGGAGGGATGTATCTATTTG-3'<br>R 5'-AAGCGTGCCATTTTATTTTC-3'    | AP003704         |
| S8                  | F 5'-GACAGACCAGAATTTGTCAA-3'<br>R 5'-GGTCATTACAAAGGTTGCAA-3'    | AP003704         |
| S9                  | F 5'-TATTAGTGTCAGGTTTTGTGTG-3'<br>R 5'-AAGAACTTGCTACTGACACTG-3' | AP003704         |

<sup>a</sup>All the markers are sequence tagged site markers.

<sup>b</sup>These are the BACs the markers located on.

**Supplemental Table 2. The primers for MIL1 molecular characterization.**

| Primer Name | Primer Sequence                        | Description                                             |
|-------------|----------------------------------------|---------------------------------------------------------|
| 3RACE-1     | 5'-ACATCAATGGCACCCCTCGTC-3'            | 3'-RACE for MIL1                                        |
| 3RACE-2     | 5'-TCCATCCATCGATCCCTACC-3'             |                                                         |
| 5RACE-1     | 5'-TCTCGTACACCGACATCATC-3'             | 5'-RACE for MIL1                                        |
| 5RACE-2     | 5'-CCACCACCTGCATCCTCATC-3'             |                                                         |
| MIL1GFP-F   | 5'-GATCCGAGCCAGAGGGCGCCGG-3'           | GFP-MIL1 fusion protein construct                       |
| MIL1GFP-R   | 5'-AAGAATTCATGAGGATGCAGGTGGTGGAG-3'    |                                                         |
| MIL1RT-F    | 5'-TCCATCCATCGATCCCTACC-3'             | RT-PCR and <i>in situ</i> hybridization for <i>MIL1</i> |
| MIL1RT-R    | 5'-GCATTTCAAACCTCATCGTCG-3'            |                                                         |
| TGAISH-F    | 5'-GAATGTCAGCCCTACAGGAA-3'             | RT-PCR and <i>in situ</i> hybridization for <i>TGA1</i> |
| TGAISH-R    | 5'-ATTCAAGAGCCATTGGAACA-3'             |                                                         |
| RECISH-F    | 5'-CTCACTCGCTCATCCATT-3'               | <i>in situ</i> hybridization for <i>REC8</i>            |
| RECISH-R    | 5'-CATCTTTGGTCCCCTTGA-3'               |                                                         |
| MER3RT-F    | 5'-TGGATCCTTTACAGTGGCATCCTGCGT-3'      | RT-PCR for <i>MER3</i>                                  |
| MER3RT-R    | 5'-TGTCGACACATACTGTTTTTCAGGGT-3'       |                                                         |
| MEL1RT-F    | 5'-AAGGAGAGAGTTCGGATGGT-3'             | RT-PCR for <i>MEL1</i>                                  |
| MEL1RT-R    | 5'-CCAACAATCTCCTCAGCAGT-3'             |                                                         |
| MEL2RT-F    | 5'-GATGCTTCCTGGCTTCAGTA-3'             | RT-PCR for <i>MEL2</i>                                  |
| MEL2RT-R    | 5'-GCAAAATCGAAGGAGAGTGA-3'             |                                                         |
| AM1RT-F     | 5'-TGGTGTA AAAAGGCACATCG-3'            | RT-PCR for <i>AM1</i>                                   |
| AM1RT-R     | 5'-CAGCAGCAATTGTTCCCTTCA-3'            |                                                         |
| REC8RT-F    | 5'-TCCACTCGTACCTCAAGCTA-3'             | RT-PCR for <i>REC8</i>                                  |
| REC8RT-R    | 5'-GTTGCTAAAACGCATGCTTG-3'             |                                                         |
| SDSRT-F     | 5'-GCTTTCAAAGTAGGGATCAATAC-3'          | RT-PCR for <i>SDS</i>                                   |
| SDSRT-R     | 5'-CCCAGAAACACAGTGTAGTACG-3'           |                                                         |
| SPO11RT-F   | 5'-CATCTCGAGGAGAAGGAGACAGTGTTTTCAA-3'  | RT-PCR for <i>SPO11-1</i>                               |
| SPO11RT-R   | 5'-TGCAGATCTTGACAGATAACGCCTCAATCTCA-3' |                                                         |
| PAIR1RT-F   | 5'-CCTCGACCCTTGCAACCTTGACAGAC-3'       | RT-PCR for <i>PAIR1</i>                                 |
| PAIR1RT-R   | 5'-GTTACCATTAATTAGCTAGGATGCGAGC-3'     |                                                         |
| UBQRT-F     | 5'-CAAGATGATCTGCCGCAAATGC-3'           | RT-PCR for <i>Ubiquitin</i>                             |
| UBQRT-R     | 5'-TTTAACCAGTCCATGAACCCG-3'            |                                                         |
| MIL1BD-F    | 5'-GCATTTCAAACCTCATCGTCG-3'            | pLexA-MIL1 and                                          |
| MIL1BD-R    | 5'-AAGAATTCATGAGGATGCAGGTGGTGGAG-3'    | pMAL-MIL1 construct                                     |
| TGAAD-F     | 5'-ATTCAAGAGCCATTGGAACA-3'             | pB42AD-TGA1 construct                                   |
| TGAAD-R     | 5'-GAATTCATGATCCAAAGTGACGCGTAC-3'      |                                                         |
